# Supplementary material
Source: ML conference proceedings conference paper supplement (https://openreview.net/forum?id=O9NAKC_MqMx)
Supplement: supplementary_material [file attachment]

# KNAPSACK PRUNING WITH INNER DISTILLATION: SUPPLEMENTARY MATERIAL

**Anonymous authors**

Paper under double-blind review

## 1 PRUNING OF ECA-RESNET-D

In this section, we present results that we obtained by pruning a neural network superior to ResNet50. We choose to prune ECA-ResNet-D. This network has a backbone of ResNet, but we add two modifications. First, we change the stem cell as presented in He et al. (2019). In addition, we add ECA modules, as suggested in Wang et al. (2019). The obtained architecture performs better than classical ResNet, and thus, pruning this network is more interesting. We have pruned different versions of ECA-ResNet-D with our method using two criteria: Flops based pruning, as described in the paper, and Inference-time based pruning. In this setting, we measure the inference time of every convolutional layer of the network, and apply our knapsack method where, instead of imposing a constraint on the total FLOPS of the pruned network, we impose a constraint on the final inference time. Most of the pruning method focus on reducing the total FLOPS of the pruned networks, but this measure does not often reflects the real inference time on a GPU, and networks with few flops such as EfficientNet Tan & Le (2019) runs with a lower throughput than heavier architecture such as ResNet. In the below table, we present the results of pruning several versions of ECA-ResNet-D, with both FLOPS based pruning and time-based pruning.

| Network                | Accuracy | Speed (Im/sec) on V100 | Speed (Im/sec) on P100 | Flops (Gigas) |
|------------------------|----------|------------------------|------------------------|---------------|
| Unpruned Architectures |          |                        |                        |               |
| Baseline, Resnet50D    | 79.30%   | 2728                   | 791                    | 4.35          |
| ECA Resnet-50D         | 80.61%   | 2400                   | 718                    | 4.35          |
| ECA Resnet-101D        | 82.19%   | 1476                   | 444                    | 8.07          |
| Flops based pruned     |          |                        |                        |               |
| ECA Resnet-50D 41%     | 80.10%   | 2434                   | 924                    | 2.56          |
| ECA Resnet-101D 55%    | 81.24%   | 1651                   | 642                    | 3.61          |
| ECA Resnet-101D 68%    | 80.69%   | 1735                   | 717                    | 2.58          |
| Time based pruned      |          |                        |                        |               |
| ECA Resnet-50D 43%     | 79.71%   | 3587                   | 1200                   | 2.53          |
| ECA Resnet-50D 39%     | 79.89%   | 3145                   | 1121                   | 2.66          |
| ECA Resnet-50D 21%     | 80.34%   | 2653                   | 906                    | 3.45          |
| ECA Resnet-101D 57%    | 80.86%   | 2791                   | 1010                   | 3.47          |

Table 1: Performance of FLOPS based and Time based pruning of ECA-ResNet on Imagenet Dataset

We can see how time-based pruning using our knapsack method provided extremely fast networks. For example, time-pruning of 57% of ECA-ResNet-101D provided a network with 80.86% accuracy while inferring at 1010 images per seconds on a P100 GPU. To the best of our knowledge, this is the fastest network of a NVIDIA P100 GPU to get an accuracy above 80% on ImageNet. The above networks and their checkpoints have been integrated on the famous Ross Wightman repository Wightman (2019), and are available to the public.

## 2 KNAPSACK PRUNING ALGORITHM

---

**Algorithm 1** Knapsack Pruning
 

---

```

input  $C, w_i \forall i$ 
  for all  $0 \leq i \leq n$  do
    Compute  $I_i \leftarrow I(w_i)$ 
    Compute  $F_i \leftarrow F(w_i)$ 
  end for
  Compute  $G \leftarrow \text{GCD}(F_i)$ 
  for all  $i$  do
     $F_i \leftarrow F_i / G$ 
  end for
   $C \leftarrow C / G$ 
  Initialize  $T \leftarrow$  0-float array of size  $2 \times C$ 
  Initialize  $K \leftarrow$  False-binary array of size  $n \times C$ 
  for all  $i$  do
     $I_{\text{curr}} \leftarrow I_i, F_{\text{curr}} \leftarrow F_i$ 
     $i_{\text{prev}} \leftarrow (i - 1) \% 2, i_{\text{curr}} \leftarrow i \% 2$ 
    for all  $0 \leq f \leq C$  do
      if  $f \geq F_i$  then
         $v_1 \leftarrow I_i + T[i_{\text{prev}}][f - F_i]$ 
      else
         $v_1 \leftarrow 0$ 
      end if
       $v_2 \leftarrow T[i_{\text{prev}}][f]$ 
      if  $F_i \leq f$  and  $v_2 \leq v_1$  then
         $T[i_{\text{curr}}][f] \leftarrow v_1$ 
         $K[i][f] \leftarrow \text{True}$ 
      else
         $T[i_{\text{curr}}][f] \leftarrow v_2$ 
      end if
    end for
  end for
   $P \leftarrow []$ 
  for  $i$  from  $n$  to 0 decreasing by 1 do
    if  $K[i][F]$  is True then
       $P \leftarrow [P, i]$ 
       $K \leftarrow K - F_{i-1}$ 
    end if
  end for
output  $P$ 

```

---

### 3 PRUNING RATIO AND PRUNED OUTPUT CHANNELS FOR RESNET 50

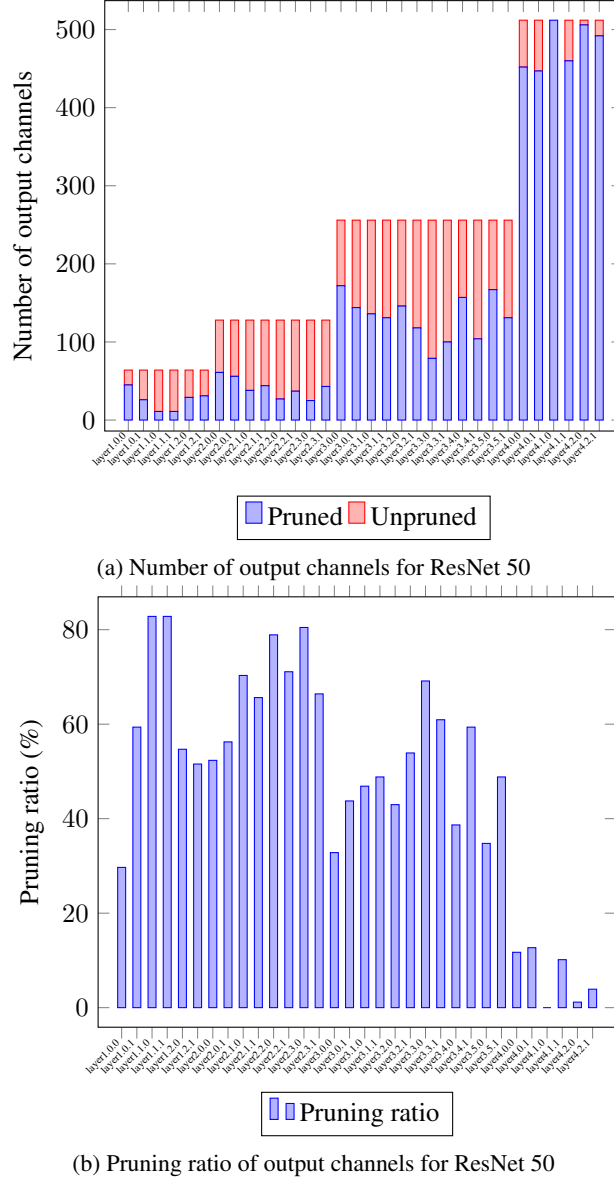

Figure 1: Pruning ratio and pruned output channels for ResNet 50

#### REFERENCES

- T. He, Z. Zhang, H. Zhang, Z. Zhang, J. Xie, and M. Li. Bag of tricks for image classification with convolutional neural networks. In *2019 IEEE/CVF Conference on Computer Vision and Pattern Recognition (CVPR)*, pp. 558–567, 2019.
- Mingxing Tan and Quoc Le. EfficientNet: Rethinking model scaling for convolutional neural networks. In Kamalika Chaudhuri and Ruslan Salakhutdinov (eds.), *Proceedings of the 36th International Conference on Machine Learning*, volume 97 of *Proceedings of Machine Learning Research*, pp. 6105–6114, Long Beach, California, USA, 09–15 Jun 2019. PMLR.
- Qilong Wang, Banggu Wu, Pengfei Zhu, Peihua Li, Wangmeng Zuo, and Qinglei Hu. Eca-net: Efficient channel attention for deep convolutional neural networks. *ArXiv*, abs/1910.03151, 2019.

Ross Wightman. *PyTorch image models repository*, url:<https://github.com/rwightman/pytorch-image-models>, 2019. URL <https://github.com/rwightman/pytorch-image-models>.
